# Supplementary material
Source: publisher site journal article supplement (https://www.dovepress.com/article/424545)
Supplement: Supplementary file 1 [file get_supplementary_file.php]

**Supplementary Figure Captions

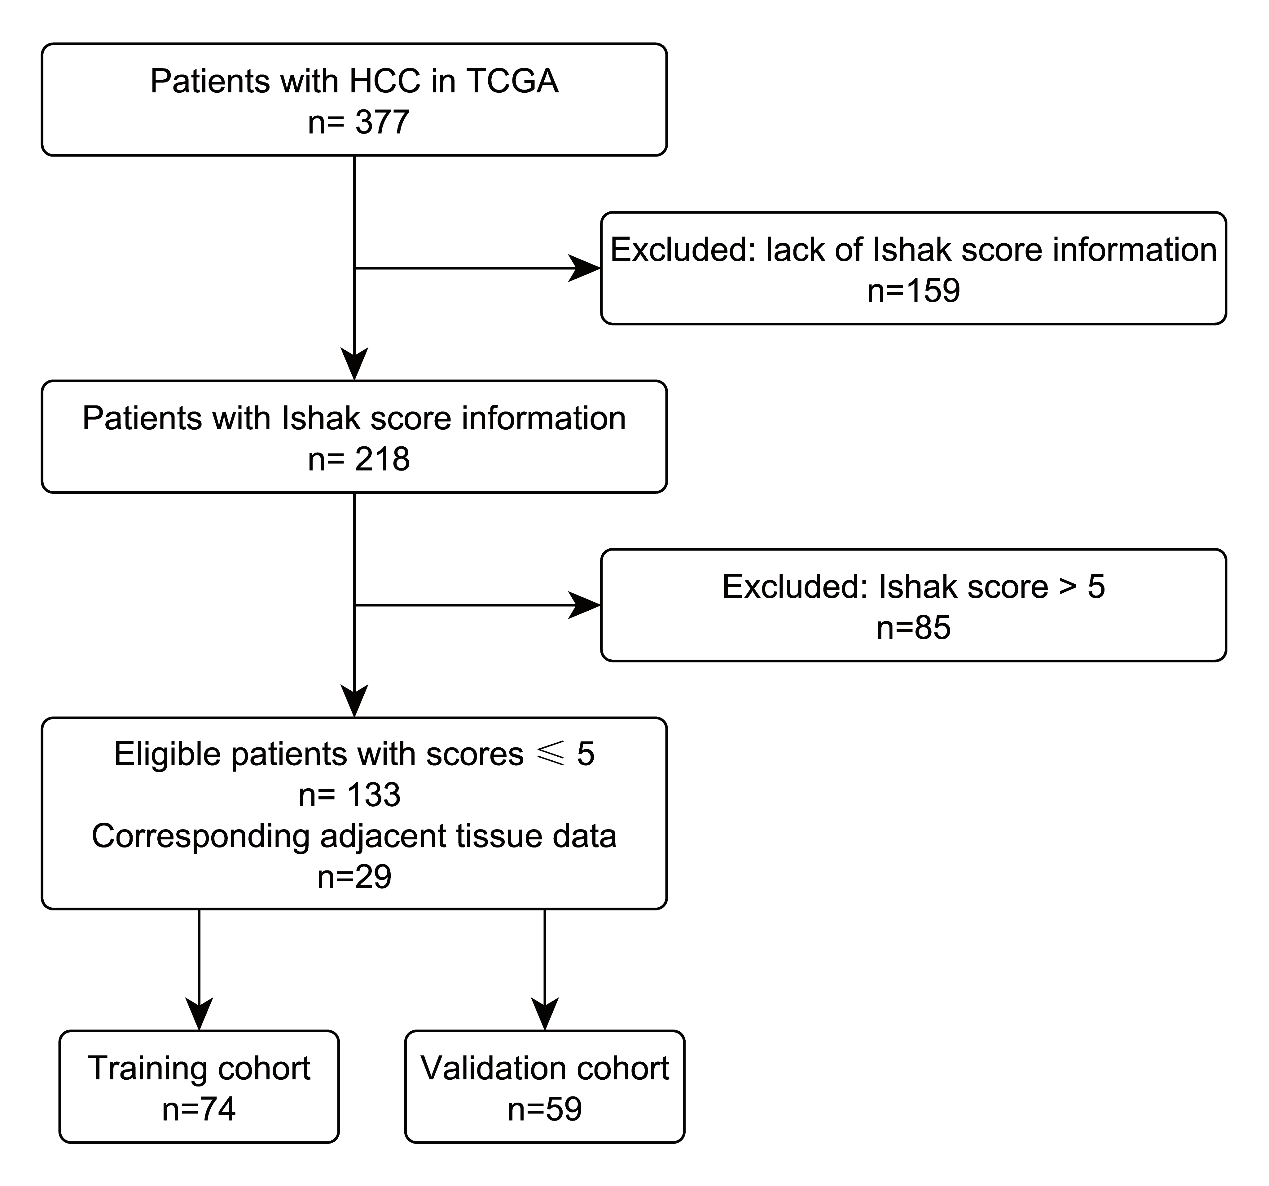
**

**Figure S1** The flowchart of case screening.


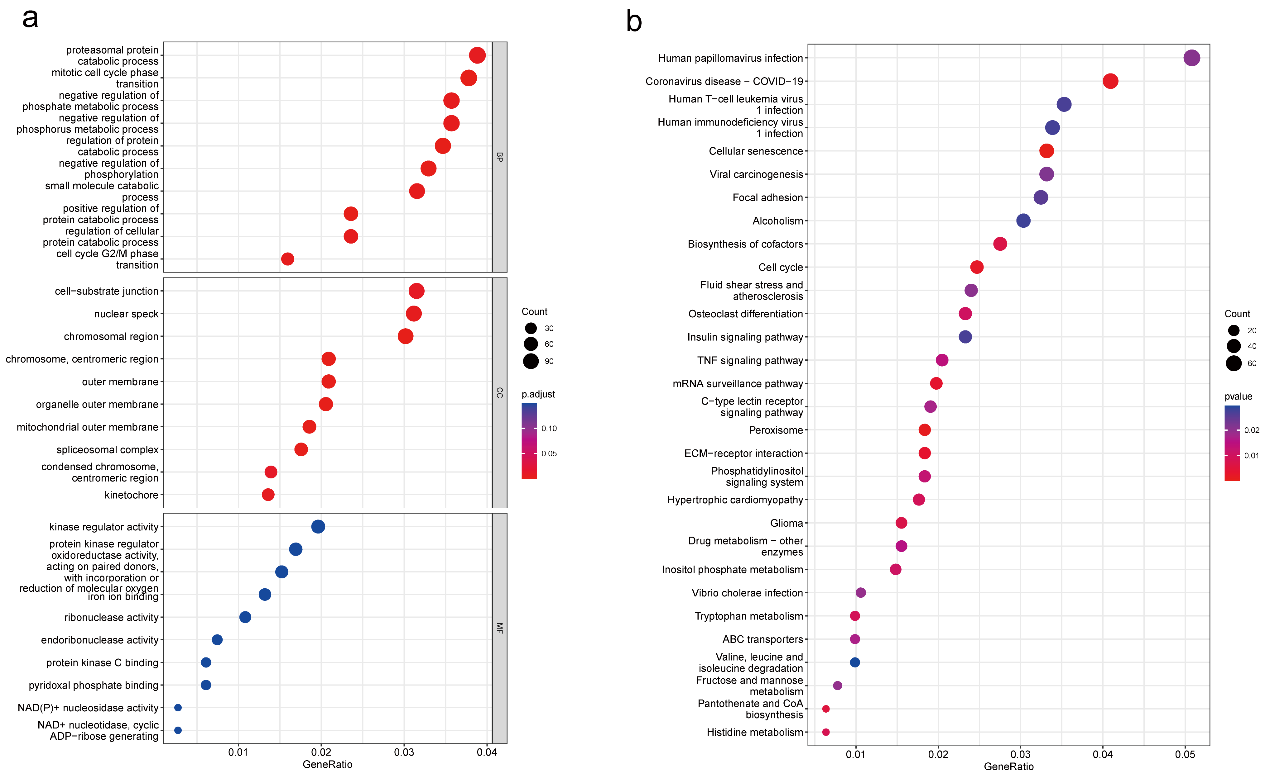


**Figure S2** Enrichment analysis of DEGs. (a-b) The gene ontology (GO) and Kyoto Encyclopedia of Genes and Genomes (KEGG) annotation results of the differentially expressed genes between NCHCC tumor tissue and adjacent tissue. NCHCC, non-cirrhotic hepatocellular carcinoma; DEGs, differently expression genes.


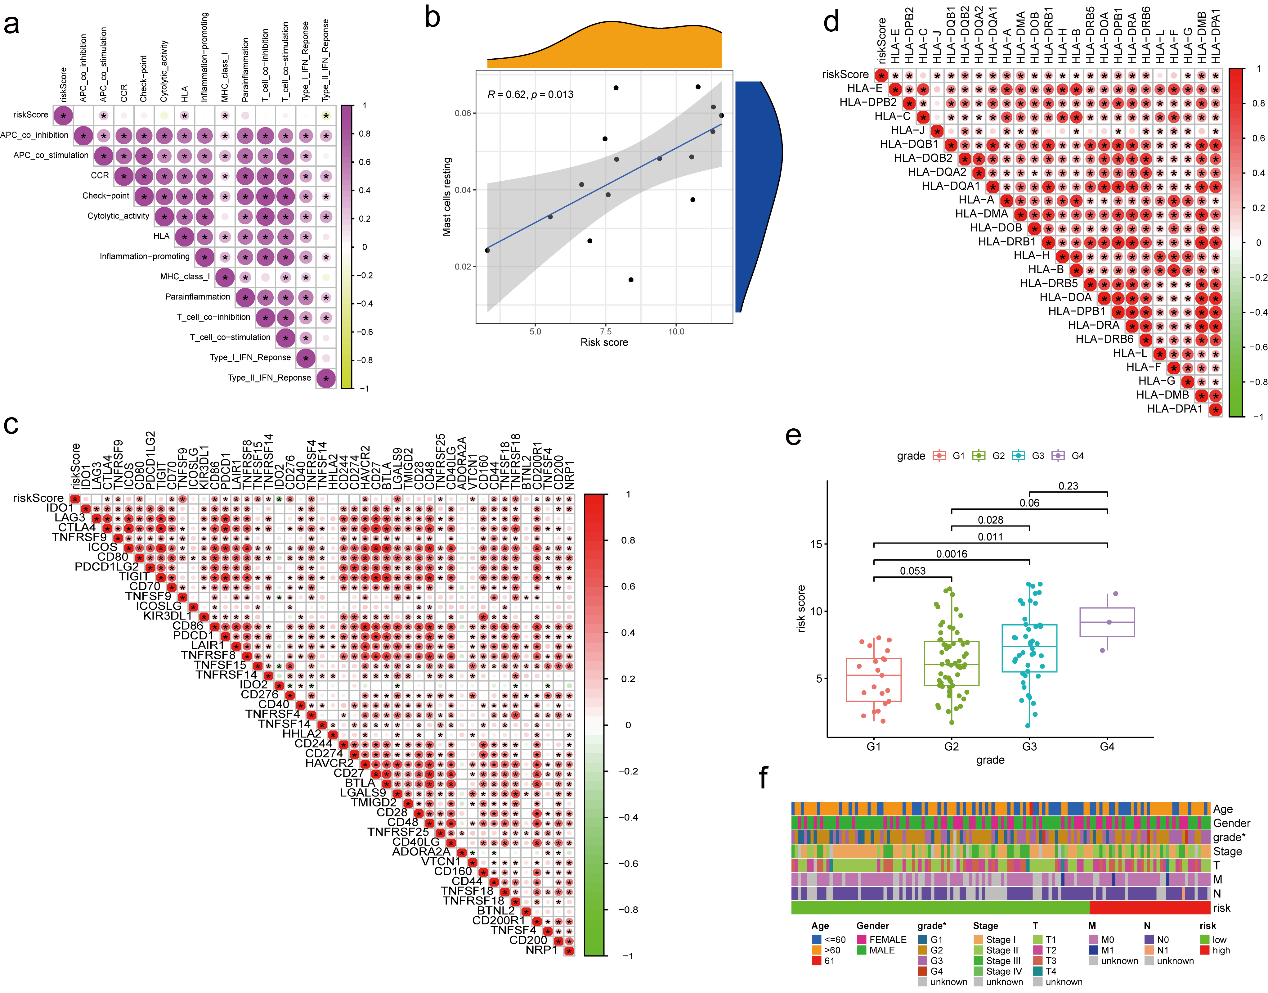


**Figure S3** Analyses of immune and clinical features in different risk groups. (a) The relationship between 14 immune signaling pathways. (b) The correlation between fraction of Mast cells resting and risk score. (c) The relationship of immune checkpoints in high- and low-risk groups. (d) The relationship of HLA-related genes. (e-f) Risk score distribution at different grade stages(e) and the heatmap of 7 clinical features between different risk groups(f). * P < 0.05.
